# Supplementary material for: Fusion with Promiscuous Gα16 Subunit Reveals Signaling Bias at Muscarinic Receptors
Source: MDPI journal article supplement (doi:10.3390/ijms221810089), 2021-09-18
Supplement: s1 [file s1]

## Supplementary material:

### Sequences of the fusion proteins

#### *Sequence: M<sub>1</sub>\_Ga<sub>16</sub>*

MNTSAPPAVSPNITVLAPGKGPWQVAFIGITTGLLSLATVTGNLLVLISFKVNTELKTVNNYFLLSLACADLIIGTFSMNLYTTYLLMGHWA  
LGTLACDLWLALDYVASNASVMNLLISFDYFYSVTRPLSYRAKTRPRAALMIGLAWLVSFVLWAPAILFWQYLVGERTVLAGQCYIQF  
LSQPIITFGTAMAAFYLPVTVMCTLYWRIYRETNRARELAALQGSETPGKGGSSSSSSERSQPGAEGSPETPPGRCCCRCCRAPRLLQAYSW  
KEEEEDEGSMESLTSSEGEPPGSEVVIKMPMVDPEAQAPTKQPPRSSPNTVKRPTKKGRDRAGKGQKPRGKEQLAKRKTFSLVKEKKA  
RTLSAILLAFILTWTPYNIMVLVSTFCKDCVPETLWELGYWLCYVNSTINPMCYALCNKAFRDFTFRLLLLCRWDKRRWRKIPKRPGSVHRT  
PTGATRARSLKWRCCPWCLTEDEKAAARVDQEINRILLEQKKQDRGELKLLLLGPGESGKSTFIKQMRIIHGAGYSEEERKGFRLVYQNIF  
VSMRAMIEAMERLQIPFSRPESKHASLVMSQDPYKVTTFEKRYAAAMQWLWRDAGIRACYERRREFHLLDSAVYYLSHLERITEEGYVP  
TAQDVLRSRMPPTTGINEYCFVQKTNLRIVDVGGQKSERKKWIHCFENVIALIYLASLSEYDQCLEENNQENRMKESLALFGTILELPWFKS  
TSVILFLNKTDILEEKIPTSHLATYFPSFQGPQDAEAAKRFILDMYTRMYTGCVDGPEGSKKGARSRRLF SHYT CATDTQ NIRKVFKDVRD  
SVLARYLDEINLL

#### *Sequence: M<sub>2</sub>\_Ga<sub>16</sub>*

MNNSTNSSNSLALTSPYKTFEVVFIVLVAGSLSLVTIIGNILVMVSIKVNRLQTVNNYFLFSLACADLIIGVFMSNLYTLYTVIGYWPLGP  
VVC DLWLALDYVVS NASVMNLLISFDYFYSVTRPLSYRAKTRPRAALMIGLAWLVSFVLWAPAILFWQYLVGERTVLAGQCYIQF  
AVTFGTIAAAFYLPVIIMTVLYWHISRASKSRIKKDKKEPVANQDPVSPSLVQGRIVKPNNNNMPSSDDGLEHNKIQNGKAPRDPVTENCVQ  
GEEKESSNDSTSVAASNMRDDEITQDENTVSTSLGHSKDENSQKTCIRIGTKTPKSDSCTPTNTTVEVVGSSGQNGDEKQNI VARKIVKM  
TKQPAKKKPPPSREKKVTRTILAILLAFIITWAPYNVMVLINTFCAPCIPNTVWTIGYWLCYINSTINPACYALCNATFKKTFKHLLMCHYKN  
TGATRARSLKWRCCPWCLTEDEKAAARVDQEINRILLEQKKQDRGELKLLLLGPGESGKSTFIKQMRIIHGAGYSEEERKGFRLVYQNIFV  
SMRAMIEAMERLQIPFSRPESKHASLVMSQDPYKVTTFEKRYAAAMQWLWRDAGIRACYERRREFHLLDSAVYYLSHLERITEEGYVPT  
AQDVLRSRMPPTTGINEYCFVQKTNLRIVDVGGQKSERKKWIHCFENVIALIYLASLSEYDQCLEENNQENRMKESLALFGTILELPWFKST  
SVILFLNKTDILEEKIPTSHLATYFPSFQGPQDAEAAKRFILDMYTRMYTGCVDGPEGSKKGARSRRLF SHYT CATDTQ NIRKVFKDVRDS  
VLARYLDEINLL

#### *Sequence: M<sub>3</sub>\_Ga<sub>16</sub>*

MTLHNNSTTSPLFPNISSSWIHSPSDAGLPPTVTHFGSYNVSRAGNFSSPDGTTDDPLGGHTVWQVVFIAFLTGILALVTIIGNILVIVSFKV  
NKQLKTVNNYFLLSLACADLIIGVISMNLFTTYIIMNRWALGNLACDLWLALDYVASNASVMNLLVISFDYFYSITRPLTYRAKRTTKRAGV  
MIGLAWVISFVLWAPAILFWQYFVGKRTVPPGECFIQFLSEPTITFTGTIAAAFYMPVTIMTILYWRIYKETEKRTELQASGTEAETENF  
VHPTGSSRSCSSYELQQQSMKRSNRRKYGRCHF WFTTKSWKPSSEQMDQDHSSSDSWNNNDAAASLENSASSDEEDIGSETRAIYSIVLKL  
PGHSTILNSTKLPSNDLQVPEEELGMVDLERKADKLQAQKSVDDGGSFPKSFSKLP IQLES AVDTAKTSDVNSSVGKSTATLPLSFKEATL  
AKRFALKTRSQITKRKRMSLVKEKKAQTL SAILLAFIITWTPYNIMVLVNTFCDCSCIPKTFWNLGYWLCYINSTVNPVCYALCNKTFRTTF  
KMLLLCQCDDKKRRKQYQYQQRQSVIFHKRAPEQTGATRARSLKWRCCPWCLTEDEKAAARVDQEINRILLEQKKQDRGELKLLLLGPGES  
GKSTFIKQMRIIHGAGYSEEERKGFRLVYQNIFVSMRAMIEAMERLQIPFSRPESKHASLVMSQDPYKVTTFEKRYAAAMQWLWRDAGI  
RACYERRREFHLLDSAVYYLSHLERITEEGYVPTAQDVLRSRMPPTTGINEYCFVQKTNLRIVDVGGQKSERKKWIHCFENVIALIYLASLS  
EYDQCLEENNQENRMKESLALFGTILELPWFKSTSVILFLNKTDILEEKIPTSHLATYFPSFQGPQDAEAAKRFILDMYTRMYTGCVDGPE  
GSKKGARSRRLF SHYT CATDTQ NIRKVFKDVRDSVLARYLDEINLL

#### *Sequence: M<sub>4</sub>\_Ga<sub>16</sub>*

MANFTPVNGSSGNQSVRLVTSSSHNRYETVEMVFIATVTGSLSLVTVVGNILVMSIKVNRLQTVNNYFLFSLACADLIIGAFSMNLYTVY  
IIKGYWPLGAVVC DLWLALDYVVS NASVMNLLISFDYFYSVTRPLSYRAKTRPRAALMIGLAWLVSFVLWAPAILFWQYFVVGKRTVPD  
NQCFIQFLSNPAVTFGTIAAAFYLPVIMTVLYIHISLASRSRVHHRPEGPKEKKAKTALFLKSPLMKQSVKKPPPGEAAREELRNGKLEEA  
PPPAPPPPRPVADKDTSNSSSGSATQNTKERPATELSTTEATTPAMPAPPLQPRALNPASRWSKIQIVTKQTGNECVTAIEIVPATPAGMRP  
AANVARKFASIARNQVRKKRQMAARERKVRTIFAILLAFILTWTPYNVMVLVNTFCQSCIPDTVWSIGYWLCYVNSTINPACYALCNATF  
KKTFRHLLLCQYRNIGTTGATRARSLKWRCCPWCLTEDEKAAARVDQEINRILLEQKKQDRGELKLLLLGPGESGKSTFIKQMRIIHGAGYS  
EERKGFRLVYQNIFVSMRAMIEAMERLQIPFSRPESKHASLVMSQDPYKVTTFEKRYAAAMQWLWRDAGIRACYERRREFHLLDSAV  
YYLSHLERITEEGYVPTAQDVLRSRMPPTTGINEYCFVQKTNLRIVDVGGQKSERKKWIHCFENVIALIYLASLSEYDQCLEENNQENRMKE  
SLALFGTILELPWFKSTSVILFLNKTDILEEKIPTSHLATYFPSFQGPQDAEAAKRFILDMYTRMYTGCVDGPEGSKKGARSRRLF SHYT CA  
TDTQ NIRKVFKDVRDSVLARYLDEINLL

Sequence: *M5\_Gα16*

MEGDSYHNATTVNGTPVNHQPLERHRLWEVITIAAVTAVVSLITIVGNVLVMISFKVNSQLKTVNNYYLLSLACADLIIGIFSMNLYTTYIL  
MGRWALGSLACDLWLALDYVASNASVMNLLVISFDRYFSITRPLTYRAKRTPKRAGIMIGLAWLISFILWAPAILCWQYLVGKRTVPLDEC  
QIQFLSEPTITFGTAIAAFYIPVSVMTILYCRIYRETEKRTKDLADLQGSDSVTKAEKRKPAHRLFRSCLRCPRPTLAQQRERNQASWSSRRS  
TSTTGKPSQATGPSANWAKAEQLTTCSSYPSEDEDKPADPVLQVVYKSQGKESPGEEFSAEETEETFVKAETEKSDYDTPNYLLSPAAAH  
RPKSQKCVAYKFRLVVKADGNQETNNGCHKVKIMPCPPVPAKEPSTKGLNPNPSHQMTKRKRVLVVKERKAAQTLAAILAFIITWTPYNI  
MVLVSTFCDKCVPVTLWHLGYWLCYVNSTVNPICYALCNRTFRKTFKMLLLCRWKKKKVEEKLYWQGN SKLTGATRARS LKWRCCPW  
CLTEDEKAAARVDQEQINRILLEQKKQDRGELKLLLLGPGESGKSTFIKQMRIHAGYSEEERKGFRLVYQNI FVSMRAMIEAMERLQIPFS  
RPESKHASLVMSQDPYKVTTFEKRYAAAMQWLWRDAGIRACYERRREFHLLDSAVYYLSHLERITEEGYVPTAQDVLRSRMPTTGINEY  
CFSVQKTNLRIVDVGGQKSERKKWIHCFENVIALIYLASLSEYDQCLEENNQENRMKESLALFGTILELPWFKSTS VILFLNKTDILEEKIPTS  
HLATYFSPFQGPQDAEAAKRFLDMYTRMYTGCVDGPEGSKKGARSRLFSHYTCATDTQNIRKVKFDVRDSVLARYLDEINLL

**Table S1: Parameters of [<sup>3</sup>H]NMS binding**

The equilibrium dissociation constant ( $K_D$ ) and maximum binding capacity ( $B_{MAX}$ ) at the cell lines expressing individual subtypes of muscarinic receptors fused with  $G\alpha_{16}$  subunit and  $K_D$  at wild-type receptors were determined in the saturation experiments.  $K_D$  is expressed as a negative logarithm and  $B_{MAX}$  is expressed in pmol of binding sites per mg of membrane proteins. Values are mean  $\pm$  SD from 3 experiments performed in quadruplicates.

|                                      | $pK_D$          | $B_{MAX}$ [pmol / mg] | wt mAChRs            | $pK_D$           | $B_{MAX}$ [pmol / mg] |
|--------------------------------------|-----------------|-----------------------|----------------------|------------------|-----------------------|
| <b>M<sub>1</sub>_Gα<sub>16</sub></b> | 9.92 $\pm$ 0.06 | 2.50 $\pm$ 0.14       | <b>M<sub>1</sub></b> | 10.00 $\pm$ 0.04 | 5.59 $\pm$ 0.12       |
| <b>M<sub>2</sub>_Gα<sub>16</sub></b> | 9.27 $\pm$ 0.06 | 1.10 $\pm$ 0.48       | <b>M<sub>2</sub></b> | 9.39 $\pm$ 0.02  | 17.34 $\pm$ 0.47      |
| <b>M<sub>3</sub>_Gα<sub>16</sub></b> | 9.98 $\pm$ 0.09 | 0.60 $\pm$ 0.46       | <b>M<sub>3</sub></b> | 10.03 $\pm$ 0.01 | 8.03 $\pm$ 0.19       |
| <b>M<sub>4</sub>_Gα<sub>16</sub></b> | 9.90 $\pm$ 0.24 | 1.13 $\pm$ 0.64       | <b>M<sub>4</sub></b> | 10.05 $\pm$ 0.08 | 9.40 $\pm$ 0.15       |
| <b>M<sub>5</sub>_Gα<sub>16</sub></b> | 9.91 $\pm$ 0.25 | 0.53 $\pm$ 0.42       | <b>M<sub>5</sub></b> | 9.80 $\pm$ 0.05  | 1.4 $\pm$ 0.03        |

**Table S2: Comparison of low-affinity binding of selected agonists to wt and fused muscarinic receptors**

Inhibition constants of indicated muscarinic agonists ( $K_i$ ) of low-affinity binding to wild-type and  $G\alpha_{16}$ \_fused receptors were calculated according to Eq. 2 from  $IC_{50}$  values that were obtained by fitting Eq. 3 to data from competition experiments with [<sup>3</sup>H]NMS.  $K_i$ s are expressed as a negative logarithm. Values are mean  $\pm$  SD from 3 experiments performed in quadruplicates.

|                     |                         | <b>M<sub>1</sub></b> | <b>M<sub>2</sub></b> | <b>M<sub>3</sub></b> | <b>M<sub>4</sub></b> | <b>M<sub>5</sub></b> |
|---------------------|-------------------------|----------------------|----------------------|----------------------|----------------------|----------------------|
| <b>carbachol</b>    | wt                      | 5.20 $\pm$ 0.04      | 5.02 $\pm$ 0.05      | 5.15 $\pm$ 0.04      | 5.00 $\pm$ 0.05      | 5.03 $\pm$ 0.05      |
|                     | Gα <sub>16</sub> _fused | 4.87 $\pm$ 0.01      | 4.62 $\pm$ 0.01      | 4.77 $\pm$ 0.02      | 4.61 $\pm$ 0.02      | 4.72 $\pm$ 0.01      |
| <b>oxotremorine</b> | wt                      | 6.43 $\pm$ 0.04      | 6.24 $\pm$ 0.03      | 6.35 $\pm$ 0.04      | 6.21 $\pm$ 0.03      | 6.27 $\pm$ 0.04      |
|                     | Gα <sub>16</sub> _fused | 6.61 $\pm$ 0.01      | 5.70 $\pm$ 0.04      | 6.24 $\pm$ 0.03      | 5.86 $\pm$ 0.02      | 6.16 $\pm$ 0.03      |
| <b>pilocarpine</b>  | wt                      | 5.83 $\pm$ 0.04      | 5.63 $\pm$ 0.04      | 5.78 $\pm$ 0.04      | 5.61 $\pm$ 0.04      | 5.68 $\pm$ 0.04      |
|                     | Gα <sub>16</sub> _fused | 5.26 $\pm$ 0.02      | 4.52 $\pm$ 0.01      | 4.92 $\pm$ 0.02      | 4.54 $\pm$ 0.03      | 4.88 $\pm$ 0.04      |
| <b>JR6</b>          | wt                      | 4.35 $\pm$ 0.07      | 4.37 $\pm$ 0.06      | 4.43 $\pm$ 0.03      | 4.27 $\pm$ 0.02      | 4.30 $\pm$ 0.10      |
|                     | Gα <sub>16</sub> _fused | 4.97 $\pm$ 0.07      | 5.74 $\pm$ 0.10      | 5.07 $\pm$ 0.04      | 5.29 $\pm$ 0.21      | 5.44 $\pm$ 0.05      |
| <b>JR7</b>          | wt                      | 4.95 $\pm$ 0.07      | 5.10 $\pm$ 0.10      | 5.10 $\pm$ 0.10      | 5.10 $\pm$ 0.10      | 5.00 $\pm$ 0.20      |
|                     | Gα <sub>16</sub> _fused | 4.34 $\pm$ 0.05      | 5.17 $\pm$ 0.07      | 4.22 $\pm$ 0.06      | 4.82 $\pm$ 0.03      | 4.46 $\pm$ 0.04      |

**Table S3: Parameters of functional response of  $G\alpha_{16}$ -fused receptors**

Parameters of functional response  $EC_{50}$  and  $E_{MAX}$  obtained by fitting Eq. 4 to data from measurement of the accumulation of inositol phosphates.

$EC_{50}$  is expressed as negative logarithms. Values are means  $\pm$ SD from 3 independent experiments performed in triplicates.

|                                     |                         | Arecoline        | Carbachol        | Furmethide       | Iperoxo          | McN-A343         | NDMC             | Oxotremorine     | Pilocarpine      | Xanomeline       | JR6 | JR7 |
|-------------------------------------|-------------------------|------------------|------------------|------------------|------------------|------------------|------------------|------------------|------------------|------------------|-----|-----|
| <b>M<sub>1</sub>_G<sub>16</sub></b> | <b>pEC<sub>50</sub></b> | 6.88 $\pm$ 0.01  | 7.08 $\pm$ 0.06  | 6.52 $\pm$ 0.03  | 8.65 $\pm$ 0.03  | 6.7 $\pm$ 0.1    | 7.61 $\pm$ 0.05  | 8.1 $\pm$ 0.05   | 6.52 $\pm$ 0.02  | 8.5 $\pm$ 0.02   | n.c | n.c |
|                                     | <b>E'MAX</b>            | 9.31 $\pm$ 0.89  | 12.75 $\pm$ 0.25 | 10.89 $\pm$ 0.09 | 15.3 $\pm$ 0.53  | 8.02 $\pm$ 0.35  | 9.33 $\pm$ 0.16  | 12.62 $\pm$ 0.39 | 11.01 $\pm$ 0.65 | 12.07 $\pm$ 0.11 | n.r | n.r |
| <b>M<sub>2</sub>_G<sub>16</sub></b> | <b>pEC<sub>50</sub></b> | 7.14 $\pm$ 0.06  | 6.99 $\pm$ 0.06  | 6.61 $\pm$ 0.03  | 8.65 $\pm$ 0.08  | 6.99 $\pm$ 0.04  | 6.99 $\pm$ 0.02  | 8.22 $\pm$ 0.08  | 6.68 $\pm$ 0.02  | 8.58 $\pm$ 0.03  | n.c | n.c |
|                                     | <b>E'MAX</b>            | 18.7 $\pm$ 0.46  | 17.97 $\pm$ 0.35 | 19.13 $\pm$ 0.38 | 27.27 $\pm$ 0.64 | 15.73 $\pm$ 0.32 | 15.13 $\pm$ 0.26 | 22.37 $\pm$ 0.64 | 15.1 $\pm$ 0.32  | 19.13 $\pm$ 0.38 | n.r | n.r |
| <b>M<sub>3</sub>_G<sub>16</sub></b> | <b>pEC<sub>50</sub></b> | 7.29 $\pm$ 0.01  | 7.08 $\pm$ 0.08  | 6.17 $\pm$ 0.31  | 9.16 $\pm$ 0.1   | 5.92 $\pm$ 0.13  | 7.61 $\pm$ 0.06  | 8.1 $\pm$ 0.05   | 6.54 $\pm$ 0.01  | 8.5 $\pm$ 0.03   | n.c | n.c |
|                                     | <b>E'MAX</b>            | 8.78 $\pm$ 0.07  | 12.97 $\pm$ 0.28 | 10.9 $\pm$ 0.15  | 18.63 $\pm$ 5.58 | 5.87 $\pm$ 0.88  | 9.3 $\pm$ 0.06   | 12.37 $\pm$ 0.41 | 11.27 $\pm$ 0.64 | 11.93 $\pm$ 0.34 | n.r | n.r |
| <b>M<sub>4</sub>_G<sub>16</sub></b> | <b>pEC<sub>50</sub></b> | 7.45 $\pm$ 0.04  | 7.38 $\pm$ 0.01  | 6.91 $\pm$ 0.01  | 8.22 $\pm$ 0.03  | 7.16 $\pm$ 0.02  | 7.01 $\pm$ 0.02  | 8.25 $\pm$ 0.01  | 6.66 $\pm$ 0.01  | 8.86 $\pm$ 0.01  | n.c | n.c |
|                                     | <b>E'MAX</b>            | 12.14 $\pm$ 1.07 | 12.82 $\pm$ 0.57 | 12.6 $\pm$ 1.22  | 15 $\pm$ 0.65    | 11.33 $\pm$ 1.12 | 10.6 $\pm$ 0.86  | 13.46 $\pm$ 0.67 | 9.94 $\pm$ 0.96  | 12.6 $\pm$ 1.22  | n.r | n.r |
| <b>M<sub>5</sub>_G<sub>16</sub></b> | <b>pEC<sub>50</sub></b> | 7.19 $\pm$ 0.14  | 7.03 $\pm$ 0.02  | 6.57 $\pm$ 0.03  | 8.72 $\pm$ 0.14  | 7.09 $\pm$ 0.11  | 7.3 $\pm$ 0.03   | 8.13 $\pm$ 0.03  | 6.6 $\pm$ 0.01   | 8.54 $\pm$ 0.01  | n.c | n.c |
|                                     | <b>E'MAX</b>            | 8.44 $\pm$ 0.09  | 15.3 $\pm$ 0.2   | 14.97 $\pm$ 0.15 | 11.3 $\pm$ 0.43  | 6.59 $\pm$ 0.16  | 12.2 $\pm$ 0.15  | 17.43 $\pm$ 0.18 | 13 $\pm$ 0.38    | 15.57 $\pm$ 0.2  | n.r | n.r |

n.c., not calculated; n.r., no response;

## Supplementary data analysis

### Quantification of agonist bias

Operational efficacy ( $\tau$ ) and agonist equilibrium dissociation constant ( $K_A$ ) of tested agonist and reference agonist are sufficient to quantify the agonism of a given ligand. The parameter  $K_A$  is specific to a combination of ligand and receptor. The parameter  $\tau$  is specific to a combination of ligand and signalling system. A parameter for characterizing agonism for a given system can be defined as a “transduction coefficient” and is equal to the logarithm of  $\tau$  to  $K_A$  ratio,  $\log(\tau/K_A)$ . The relative efficiency of two agonists producing activation of a given pathway is quantified as the difference between value of transduction coefficient of tested ligand and transduction coefficient of reference ligand,  $\Delta\log(\tau/K_A)$ . For a biased ligand,  $\Delta\log(\tau/K_A)$  of the biased pathway is greater than  $\Delta\log(\tau/K_A)$  of another (reference) pathway. Analogically, two systems of a single signaling pathway and two different receptors can be compared. A ligand that has greater  $\Delta\log(\tau/K_A)$  at one system (receptor) than at other is biased to a given system (receptor). Then, the ligand bias for receptor A over receptor B is quantified according to Eq. 1.

$$\text{Bias factor} = 10^{\Delta\log\left(\frac{\tau}{K_A}\right)_{\text{receptor A}} - \Delta\log\left(\frac{\tau}{K_A}\right)_{\text{receptor B}}} \quad \text{Eq. S1}$$

**Table S4: Quantification of agonist bias via  $\Delta\Delta\log(\tau/K_A)$ .**

Values of  $\tau$  and  $K_A$  were calculated according to Eq. 5, 6 and are summarized in Table 2 of the main manuscript. First, the transduction coefficient,  $\log(\tau/K_A)$ , was calculated. Then, the relative efficiency to the reference agonist carbachol as difference in transduction coefficients,  $\Delta\log(\tau/K_A)$ .

Ligand bias at two different G16\_fused receptors equal to differences of relative efficiencies on these pathways,  $\Delta\Delta\log(\tau/K_A)$ , was used for determination of agonist bias according Eq.S1. Parameters  $\Delta\log(\tau/K_A)$ ;  $\Delta\Delta\log(\tau/K_A)$  and bias factor  $10^{\Delta\Delta\log(\tau/K_A)}$  are summarized in table S4 a,b,c.

a)

| $\Delta\log(\tau/K_A)$ | Arecoline                | Furmethide                | Iperoxo                  | McN-A343            | NDMC                      | Oxotremorine              | Pilocarpine         | Xanomeline               |
|------------------------|--------------------------|---------------------------|--------------------------|---------------------|---------------------------|---------------------------|---------------------|--------------------------|
| <b>M1</b>              | -0.294 $\pm$ 0.034       | -0.632 $\pm$ 0.018        | 1.690 $\pm$ 0.0425       | -0.544 $\pm$ 0.06   | <b>0.381</b> $\pm$ 0.0295 | 1.011 $\pm$ 0.0385        | -0.633 $\pm$ 0.03   | 1.402 $\pm$ 0.0135       |
| <b>M2</b>              | <b>0.176</b> $\pm$ 0.049 | <b>-0.347</b> $\pm$ 0.032 | 1.854 $\pm$ 0.1535       | -0.055 $\pm$ 0.0305 | -0.071 $\pm$ 0.018        | <b>1.338</b> $\pm$ 0.0805 | -0.383 $\pm$ 0.02   | <b>1.623</b> $\pm$ 0.032 |
| <b>M3</b>              | 0.070 $\pm$ 0.007        | -0.996 $\pm$ 0.160        | <b>2.263</b> $\pm$ 0.488 | -1.466 $\pm$ 0.088  | <b>0.364</b> $\pm$ 0.0315 | 0.998 $\pm$ 0.0385        | -0.610 $\pm$ 0.0245 | 1.378 $\pm$ 0.026        |
| <b>M4</b>              | 0.042 $\pm$ 0.056        | -0.476 $\pm$ 0.047        | 0.922 $\pm$ 0.0425       | -0.275 $\pm$ 0.045  | -0.458 $\pm$ 0.035        | 0.895 $\pm$ 0.0295        | -0.837 $\pm$ 0.032  | 1.475 $\pm$ 0.047        |
| <b>M5</b>              | -0.024 $\pm$ 0.073       | -0.471 $\pm$ 0.02         | 1.625 $\pm$ 0.0855       | -0.238 $\pm$ 0.0595 | 0.169 $\pm$ 0.0195        | 1.160 $\pm$ 0.023         | -0.508 $\pm$ 0.0165 | 1.517 $\pm$ 0.0125       |

b)

| $\Delta\Delta\log(\tau/K_A)$ | Arecoline          | Furmethide          | Iperoxo            | McN-A343           | NDMC                | Oxotremorine        | Pilocarpine         | Xanomeline         |
|------------------------------|--------------------|---------------------|--------------------|--------------------|---------------------|---------------------|---------------------|--------------------|
| <b>M2 vs M1</b>              | 0.470 $\pm$ 0.049  | 0.285 $\pm$ 0.032   | 0.164 $\pm$ 0.1535 | 0.489 $\pm$ 0.06   | -0.452 $\pm$ 0.0295 | 0.327 $\pm$ 0.0805  | 0.250 $\pm$ 0.03    | 0.221 $\pm$ 0.032  |
| <b>M3 vs M1</b>              | 0.364 $\pm$ 0.034  | -0.364 $\pm$ 0.160  | 0.574 $\pm$ 0.488  | -0.922 $\pm$ 0.088 | -0.018 $\pm$ 0.032  | -0.013 $\pm$ 0.039  | 0.024 $\pm$ 0.030   | -0.025 $\pm$ 0.026 |
| <b>M4 vs M1</b>              | 0.337 $\pm$ 0.056  | 0.156 $\pm$ 0.047   | -0.768 $\pm$ 0.043 | 0.269 $\pm$ 0.060  | -0.839 $\pm$ 0.035  | -0.117 $\pm$ 0.039  | -0.204 $\pm$ 0.032  | 0.072 $\pm$ 0.047  |
| <b>M5 vs M1</b>              | 0.270 $\pm$ 0.073  | 0.160 $\pm$ 0.020   | -0.065 $\pm$ 0.086 | 0.306 $\pm$ 0.060  | -0.212 $\pm$ 0.030  | 0.149 $\pm$ 0.039   | 0.125 $\pm$ 0.030   | 0.115 $\pm$ 0.014  |
| <b>M3 vs M2</b>              | -0.105 $\pm$ 0.049 | -0.649 $\pm$ 0.1595 | 0.410 $\pm$ 0.488  | -1.411 $\pm$ 0.088 | 0.435 $\pm$ 0.0315  | -0.339 $\pm$ 0.0805 | -0.226 $\pm$ 0.0245 | -0.246 $\pm$ 0.032 |
| <b>M4 vs M2</b>              | -0.133 $\pm$ 0.056 | -0.129 $\pm$ 0.047  | -0.931 $\pm$ 0.154 | -0.220 $\pm$ 0.045 | -0.387 $\pm$ 0.035  | -0.443 $\pm$ 0.081  | -0.454 $\pm$ 0.032  | -0.149 $\pm$ 0.047 |
| <b>M5 vs M2</b>              | -0.200 $\pm$ 0.073 | -0.125 $\pm$ 0.032  | -0.229 $\pm$ 0.154 | -0.183 $\pm$ 0.060 | 0.240 $\pm$ 0.020   | -0.178 $\pm$ 0.081  | -0.125 $\pm$ 0.020  | -0.106 $\pm$ 0.032 |
| <b>M4 vs M3</b>              | -0.028 $\pm$ 0.056 | 0.520 $\pm$ 0.160   | -1.341 $\pm$ 0.488 | 1.190 $\pm$ 0.088  | -0.822 $\pm$ 0.035  | -0.104 $\pm$ 0.039  | -0.227 $\pm$ 0.032  | 0.097 $\pm$ 0.047  |
| <b>M5 vs M3</b>              | -0.094 $\pm$ 0.073 | 0.525 $\pm$ 0.160   | -0.639 $\pm$ 0.488 | 1.228 $\pm$ 0.088  | -0.194 $\pm$ 0.032  | 0.162 $\pm$ 0.039   | 0.101 $\pm$ 0.025   | 0.140 $\pm$ 0.026  |
| <b>M5 vs M4</b>              | -0.066 $\pm$ 0.073 | 0.004 $\pm$ 0.047   | 0.703 $\pm$ 0.086  | 0.038 $\pm$ 0.060  | 0.627 $\pm$ 0.035   | 0.266 $\pm$ 0.030   | 0.328 $\pm$ 0.032   | 0.043 $\pm$ 0.047  |

c)

$10^{\Delta\log(\tau/K_A)}$

|                 | Arecoline    | Furmethide  | Iperoxo    | McN-A343     | NDMC        | Oxotremorine | Pilocarpine | Xanomeline  |
|-----------------|--------------|-------------|------------|--------------|-------------|--------------|-------------|-------------|
| <b>M2 vs M1</b> | 2.95 ±0.31   | 1.93 ±0.22  | 1.46 ±1.37 | 3.08 ± 0.38  | 0.35 ± 0.02 | 2.12 ± 0.52  | 1.78 ± 0.21 | 1.66 ± 0.24 |
| <b>M3 vs M1</b> | 2.31 ±0.21   | 0.43 ±0.19  | 3.75 ±3.19 | 0.12 ± 0.01  | 0.96 ± 1.73 | 0.97 ± 2.93  | 1.06 ± 1.35 | 0.94 ± 0.99 |
| <b>M4 vs M1</b> | 2.17 ±0.36   | 1.43 ±0.43  | 0.17 ±0.01 | 1.86 ± 0.41  | 0.14 ± 0.01 | 0.76 ± 0.25  | 0.63 ± 0.10 | 1.18 ± 0.77 |
| <b>M5 vs M1</b> | 1.86 ±0.50   | 1.45 ±0.18  | 0.86 ±1.13 | 2.02 ± 0.40  | 0.61 ± 0.09 | 1.41 ± 0.36  | 1.33 ± 0.32 | 1.30 ± 0.15 |
| <b>M3 vs M2</b> | 0.785 ±0.366 | 0.22 ±0.06  | 2.57 ±3.06 | 0.04 ± 0.00  | 2.72 ± 0.20 | 0.46 ± 0.11  | 0.59 ± 0.06 | 0.57 ± 0.07 |
| <b>M4 vs M2</b> | 0.736 ±0.307 | 0.74 ±0.27  | 0.12 ±0.02 | 0.60 ± 0.12  | 0.41 ± 0.04 | 0.36 ± 0.07  | 0.35 ± 0.02 | 0.71 ± 0.22 |
| <b>M5 vs M2</b> | 0.632 ±0.229 | 0.75 ±0.19  | 0.59 ±0.40 | 0.66 ± 0.21  | 1.74 ± 0.14 | 0.66 ± 0.30  | 0.75 ± 0.12 | 0.78 ± 0.24 |
| <b>M4 vs M3</b> | 0.938 ±1.866 | 3.31 ±1.02  | 0.05 ±0.02 | 15.51 ± 1.15 | 0.15 ± 0.01 | 0.79 ± 0.29  | 0.59 ± 0.08 | 1.25 ± 0.61 |
| <b>M5 vs M3</b> | 0.805 ±0.619 | 3.35 ±1.02  | 0.23 ±0.18 | 16.91 ± 1.21 | 0.64 ± 0.10 | 1.45 ± 0.35  | 1.26 ± 0.31 | 1.38 ± 0.26 |
| <b>M5 vs M4</b> | 0.858 ±0.937 | 1.01 ±10.71 | 5.05 ±0.61 | 1.09 ± 1.73  | 4.24 ± 0.24 | 1.84 ± 0.20  | 2.13 ± 0.21 | 1.10 ± 1.22 |

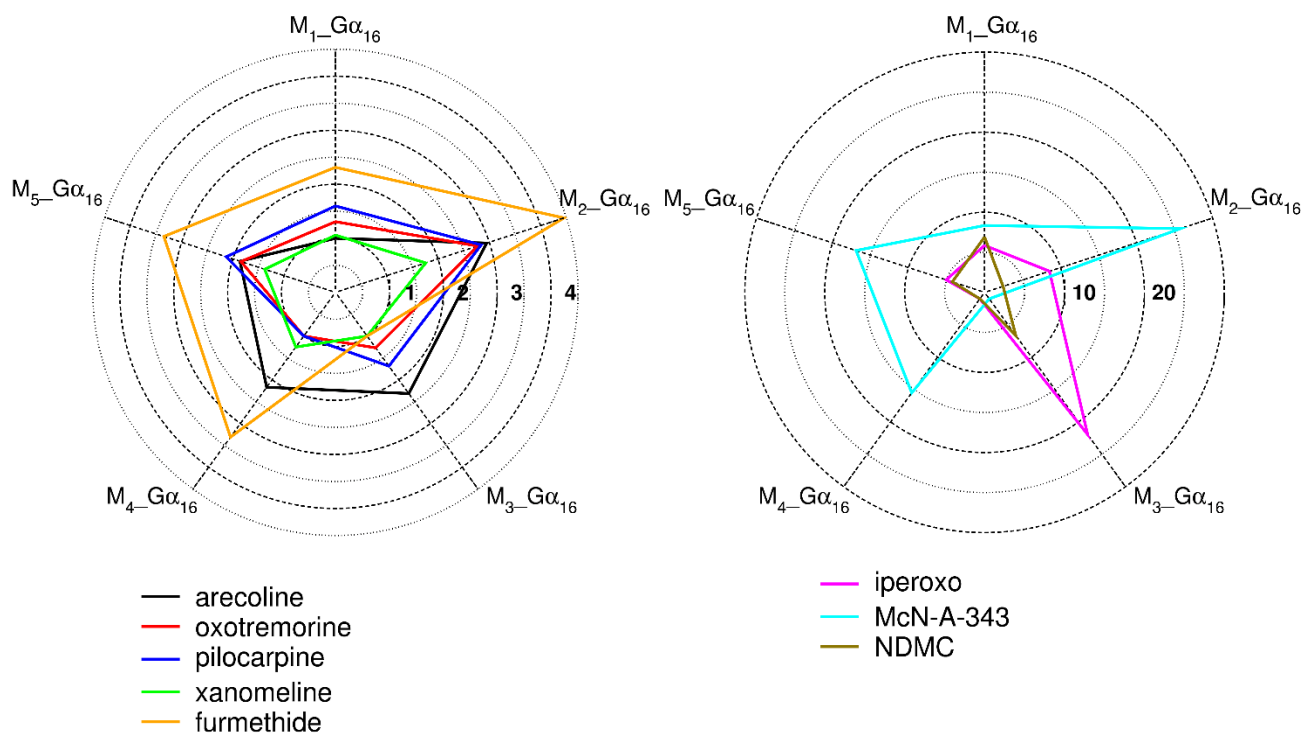

**Figure S1: Polar plot of agonist bias factors.**

Bias factors of individual agonists in the given receptor system  $10^{\Delta\log(\tau/KA)}$  calculated according to Eq. S1 are plotted. Values are expressed as ratios of bias factors to bias factor at receptor with the lowest activity for given agonist (Arecoline M1; Furmethide, McN-A-343, Xanomeline M3; NDMC, Oxotremorine, Iperoxo, Pilocarpine M4).

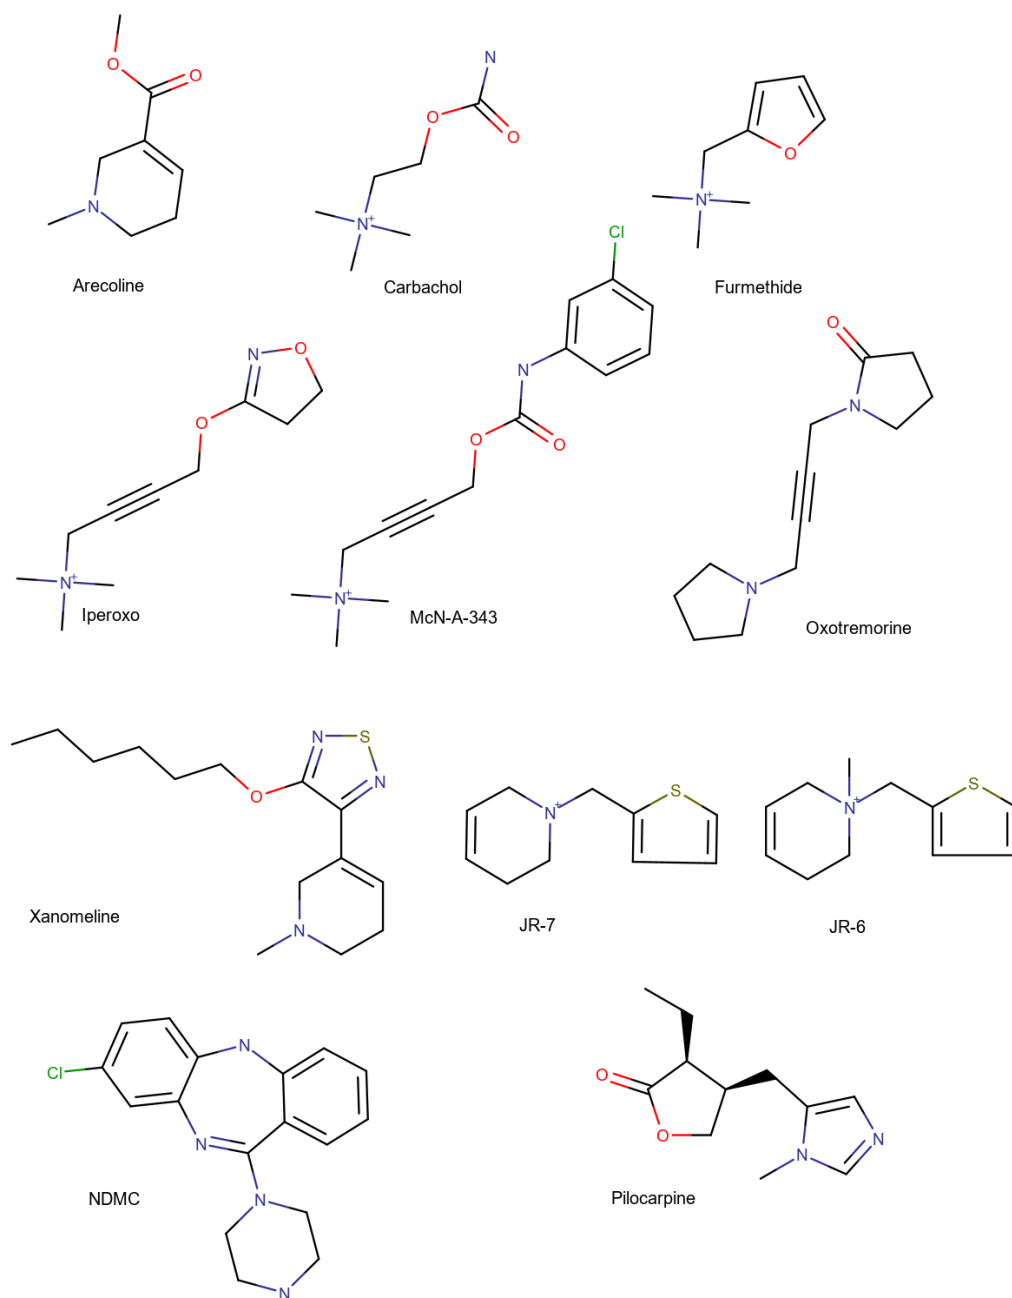

**Figure S2: Structures of used agonists**

**Arecoline:** methyl 1-methyl-3,6-dihydro-2H-pyridine-5-carboxylate; **Carbachol:** 2-carbamoyloxyethyl(trimethyl)azanium; **Furmethide:** furan-2-ylmethyl(trimethyl)azanium; **Iperoxo:** 4-(4,5-dihydro-1,2-oxazol-3-yloxy)but-2-ynyl-trimethylazanium; **McN-A-343:** 4-(trimethylazaniumyl)but-2-yn-1-yl N-(3-chlorophenyl)carbamate; **Oxotremorine:** 1-[4-(pyrrolidin-1-yl)but-2-yn-1-yl]pyrrolidin-2-one; **Xanomeline:** 3-hexoxy-4-(1-methyl-3,6-dihydro-2H-pyridin-5-yl)-1,2,5-thiadiazole; **JR6:** 1-[(thiophen-2-yl) methyl]-1,2,3,6-tetrahydropyridin-1-ium; **JR7:** 1-methyl-1-[(thiophen-2-yl)methyl]-1,2,3,6-tetrahydropyridin-1-ium; **N-desmethyloclozapine (NDMC):** 3-chloro-6-piperazin-1-yl-1H-benzo[b][1,4]benzodiazepine; **Pilocarpine:** (3S,4R)-3-ethyl-4-[(1-methyl-1H-imidazol-5-yl)methyl]oxolan-2-one.



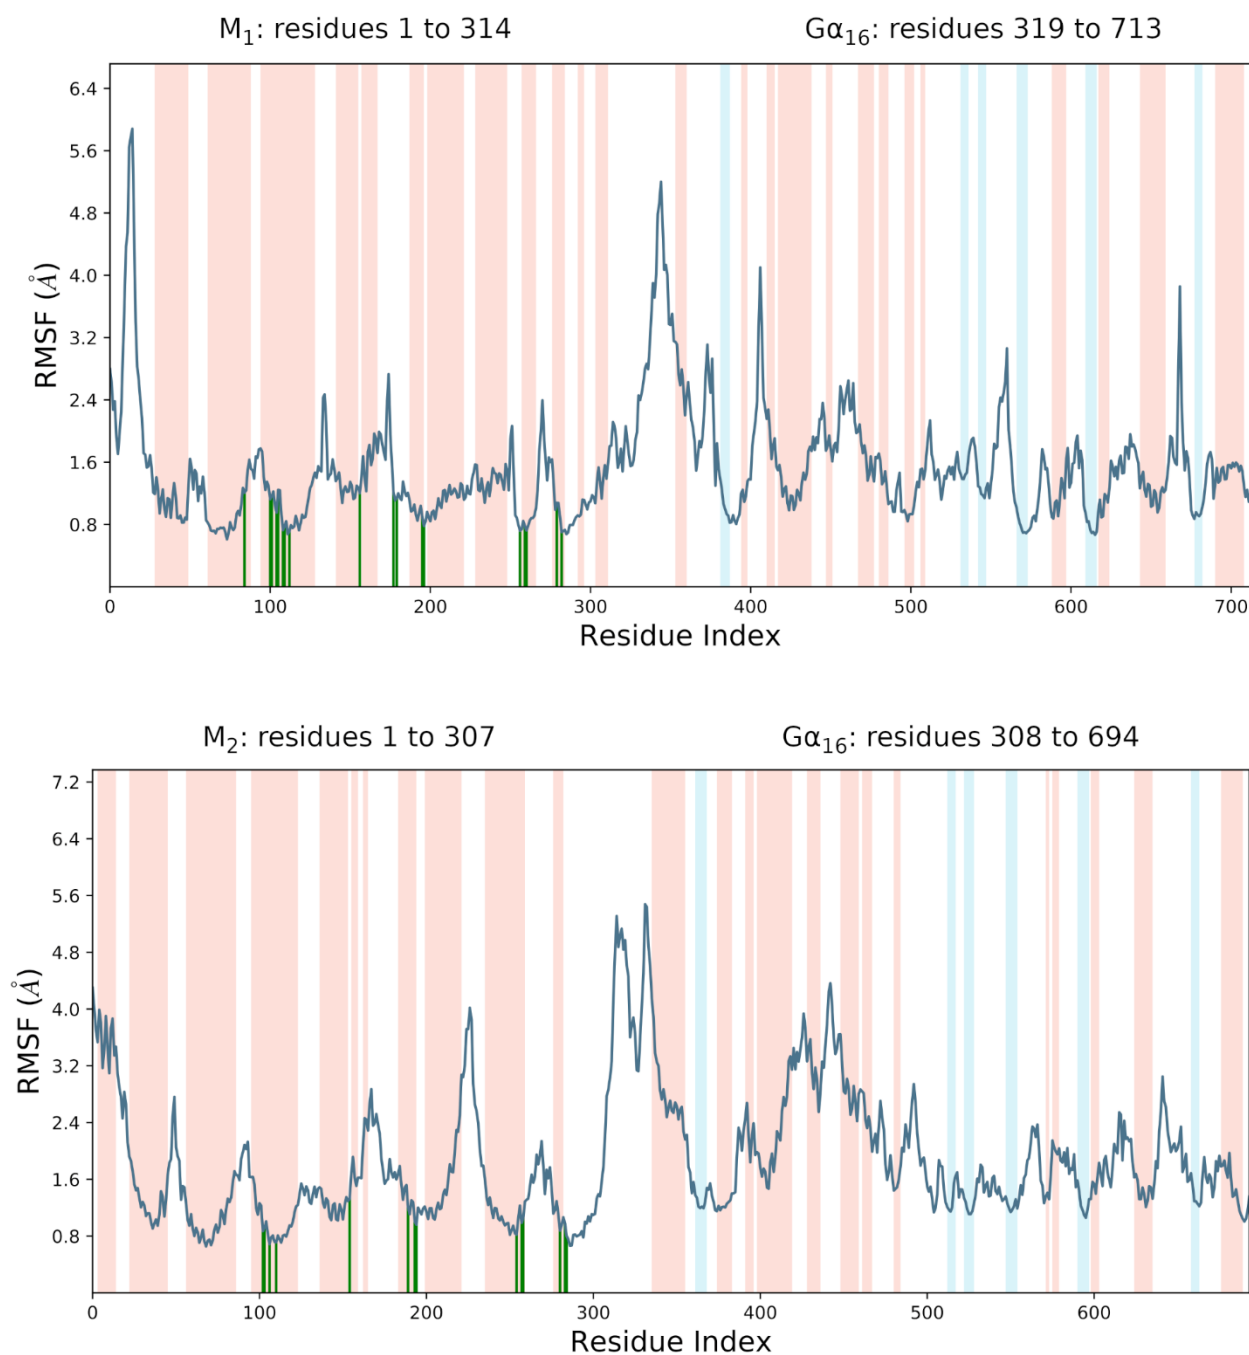

**Figure S3: The Root Mean Square Fluctuation (RMSF) of fusion proteins.**

RMSF in Å of individual residues of M<sub>1</sub>\_Gα<sub>16</sub> (top) and M<sub>2</sub>\_Gα<sub>16</sub> (bottom) from 120-ns simulation of molecular dynamics. Secondary Structure Elements: Alpha-helical and beta-strand regions are highlighted in red and blue backgrounds, respectively. These regions are defined by helices or strands that persist over 70% of the entire simulation. Ligand Contacts: Protein residues that interact with the ligand are marked with green-colored vertical bars.
